# Supplementary material
Source: PubMed Central journal article supplement (PMC8968057)
Supplement: mmc2.pdf [file mmc2.pdf]

## *Part 1 Perceptions of Novel Coronavirus Pneumonia*

BF1. How likely do you think it is that you will contract novel coronavirus pneumonia over the next one month? (Read out answers 1-7)

1. Never
  2. Very unlikely
  3. Unlikely
  4. Evens/ half-half
  5. Likely
  6. Very likely
  7. Certain
8888. Don't know/ hard to say  
-99. Refuse to answer

BF3. How serious or mild do you think novel coronavirus pneumonia would be for you if you were infected? (Read out answers 1-5)

1. Very mild
  2. Mild
  3. Moderate
  4. Serious
  5. Very serious
8888. Don't know/ hard to say  
-99. Refuse to answer

BF5. How much do you worry that you would be infected with novel coronavirus pneumonia in the next one month? (Read out answers 1-5)

1. Not at all worried
  2. Slightly worried
  3. Moderately worried
  4. Very much worried
  5. Extremely worried
8888. Don't know/ hard to say  
-99. Refuse to answer

## *Part 2 Attitudes Towards the Epidemic*

BF7. Please tell me how much you agree or disagree with the following statement (Read out items a, b, answers 1-5)

- a. I'm confident that I can take measures to protect myself against novel coronavirus pneumonia
- b. I believe that the Hong Kong government can take effective measures to control novel coronavirus pneumonia spread in Hong Kong

1. Strongly disagree
2. Disagree
3. Half-half/ neutral

- 4. Agree
- 5. Strongly agree
- 8888. Don't know/ hard to say
- 99. Refuse to answer

### *Part 3 Attitudes Towards COVID-19 Vaccines*

VA3b. [Version 1, administered November 2020-January 2021] If a COVID-19 vaccine was approved for use in Hong Kong and was available for Hong Kong people at no cost, how likely will you take the COVID-19 vaccine?

- 1. Never
- 2. Very unlikely
- 3. Unlikely
- 4. Evens/ half-half
- 5. Likely
- 6. Very likely
- 7. Certain
- 8888. Don't know/ hard to say
- 99. Refuse to answer

VA11. [Administered February-July 2021] Have you already received a COVID-19 vaccine?

- 1. Yes -> VA2
- 2. No -> VA3b
- 8888. Don't know/ don't remember -> VA3b
- 99. Refuse to answer -> VA3b

VA3b. [Version 2, administered February-July 2021] COVID-19 vaccines have been approved for use in Hong Kong and available for Hong Kong people at no cost, how likely will you take the COVID-19 vaccine in the next 3 months? (Read out answers 1-7)

- 1. Never
- 2. Very unlikely
- 3. Unlikely
- 4. Evens/ half-half
- 5. Likely
- 6. Very likely
- 7. Certain
- 8888. Don't know/ hard to say
- 99. Refuse to answer

VA2. We would like to know your opinions about COVID-19 vaccines. Please tell me how much you agree or disagree with the following statement: **(order in random)** (Read out items d-h, answers 1-5)

- d. (Overall) I think COVID-19 vaccines will be safe
- e. (Overall) I think COVID-19 vaccines will be important for children to have
- f. (Overall) I think COVID-19 vaccines will be effective
- g. COVID-19 vaccines are compatible with my religious beliefs
- h. Receiving COVID-19 vaccines are compatible with my personal value

1. Strongly disagree
  2. Disagree
  3. Half-half/ neutral
  4. Agree
  5. Strongly agree
8888. Don't know/ hard to say  
-99. Refuse to answer

#### *Part 4 Preventive Measures*

PM3. In the past 7 days, what did you do to prevent yourself from contracting novel coronavirus pneumonia? (Read out items a, j-n)

- a. Avoid going to crowded places
- j. Avoid going out as much as possible
- k. Avoid going to health care facilities
- l. Keep appropriate social distancing with people outside of your family in public places
- m. Avoid using public transportation when not necessary (e.g. going out on holidays)
- n. Avoid social gathering (such as having lunch/dinner)

1. Yes
  2. No
8888. Don't know/ hard to say  
-99. Refuse to answer

#### *Part 5 Demographics*

SG1. Gender

1. Female
2. Male

SG2a. Age

\_\_\_\_\_ (exact number)

Refuse to answer → SG2b

SG2b. {for those who are not willing to give exact age} Age group

1. 18-24
  2. 25-34
  3. 35-44
  4. 45-54
  5. 55-64
  6. 65 or above
- 99. Refuse to answer

SG3. What is your education level?

1. Not educated, pre-elementary education
2. Primary
3. Junior secondary (F.1 - F.3)
4. Senior secondary (F.4 - F.7 / DSE / Yi Jin / vocational training included)
5. Tertiary, non-degree (Diploma / Certificate/ Associate degree)
6. Tertiary, degree (Degree / Postgraduate or above)
- 99. Refuse to answer

DM4. What is your occupation?

1. Executive and professional
2. Clerical and service worker
3. Production worker
4. Student
5. Homemaker / housewife
6. Retired person
7. Unemployed or not working for other reason
8881. Others (Please specify: \_\_\_\_\_ )
- 99. Refuse to answer

DM5. Has a doctor ever told you that you have any chronic medical conditions? If yes, what kind of chronic medical condition(s) do you have? (Choose all that apply)

1. Cancer
2. Heart disease, like a previous heart attack, heart failure, angina, or coronary heart disease
3. Hypertension
4. High cholesterol
5. Diabetes
6. Stroke
7. Asthma, Chronic Obstructive Pulmonary Disease (COPD) or any other chronic lung disease
8. Kidney disease (NOTE: NOT including kidney stones, bladder infection or incontinence)
9. Liver disease, including chronic hepatitis
10. Depression or anxiety disorder
8881. Others (Please specify: \_\_\_\_\_ )
8886. None
8888. Don't know
- 99. Refuse to answer
