# Supplementary material
Source: PubMed Central journal article supplement (PMC8968057)
Supplement: mmc4.pdf [file mmc4.pdf]

COVID-19 vaccine uptake and hesitancy

Administered November 2020-January 2021

Administered February-July 2021

Vaccination intention: How likely will you take the COVID-19 vaccine?

Have you already received a COVID-19 vaccine?

Intent to take the vaccine: answered likely, very likely or certain

Hesitant or refuse to take the vaccine: answered never, very unlikely, unlikely, or evens

Vaccinated (received at least one dose)

Vaccination intention: How likely will you take the COVID-19 vaccine (in the next three months)?

Intent to take the vaccine: answered likely, very likely or certain

Hesitant or refuse to take the vaccine: answered never, very unlikely, unlikely, or evens
