# Supplementary material
Source: PubMed Central journal article supplement (PMC8968057)

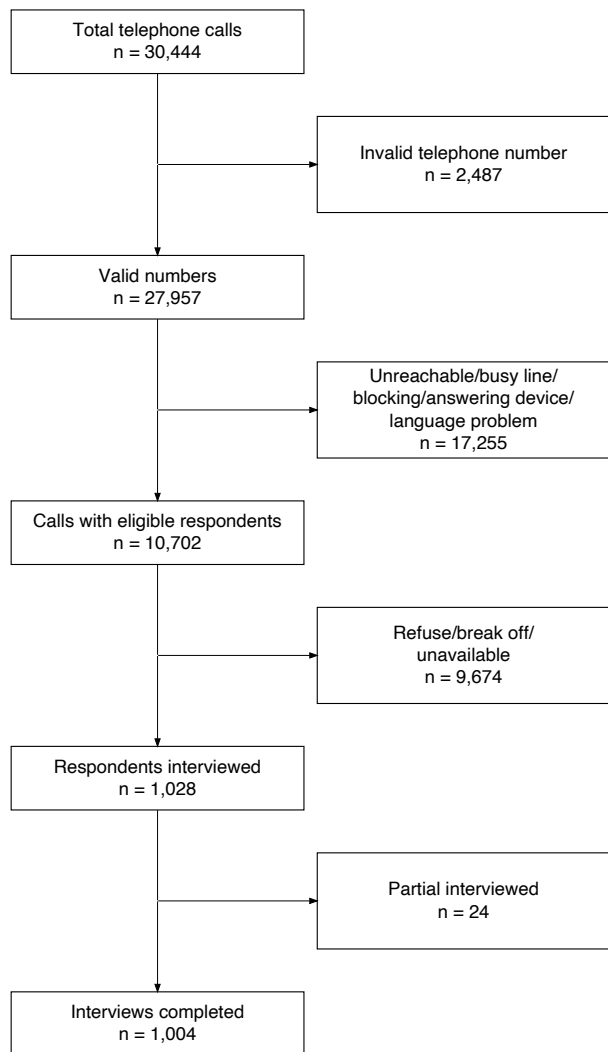

a

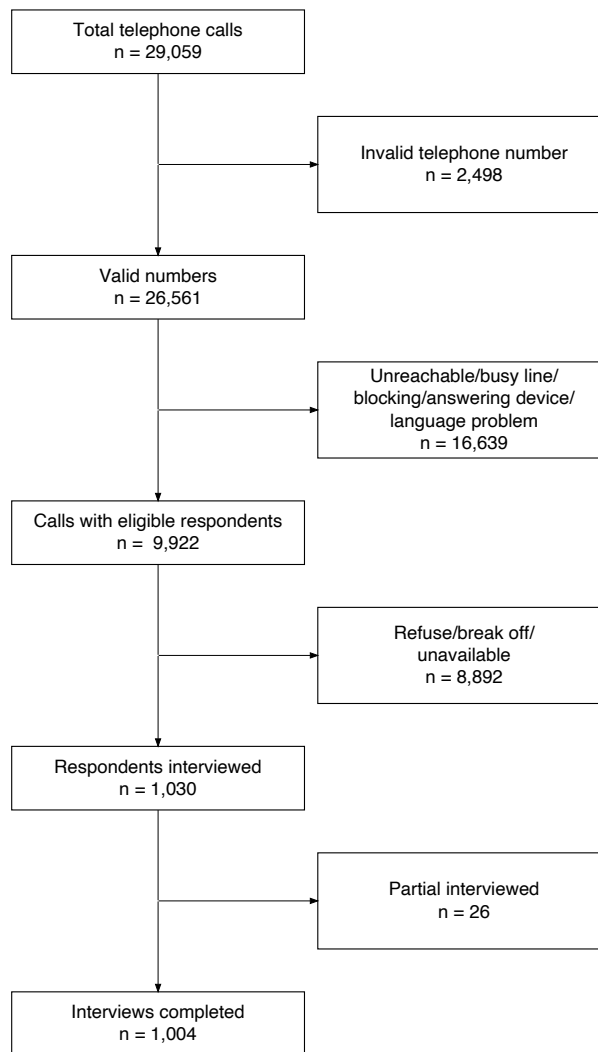

b

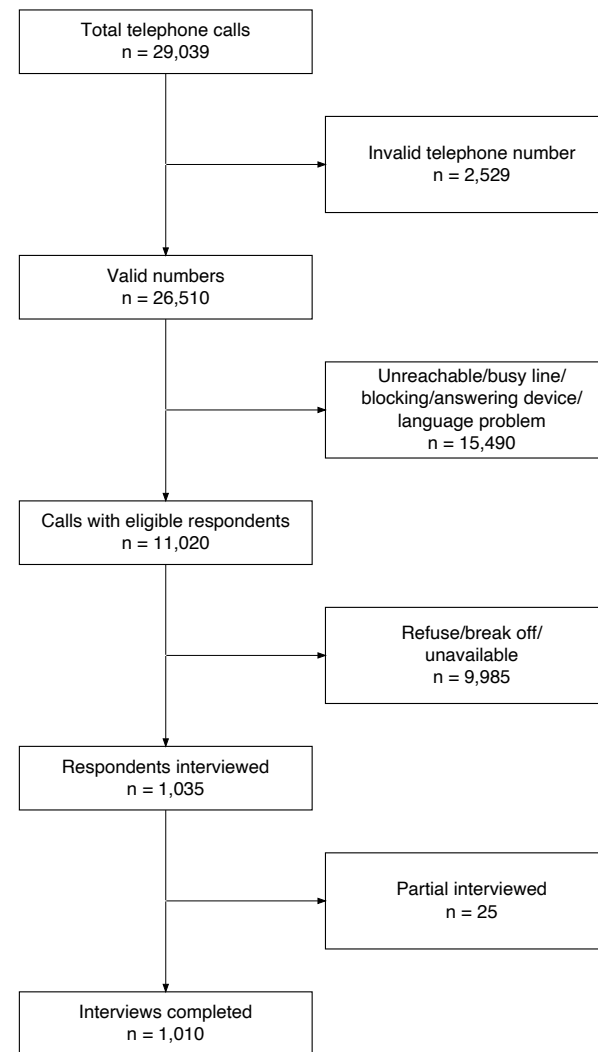

c

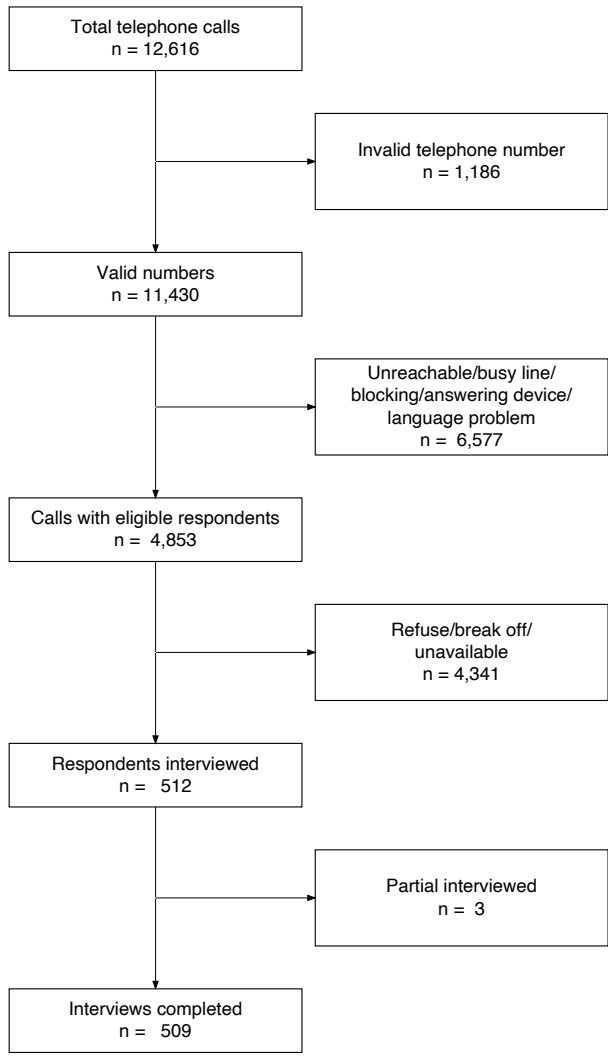

d

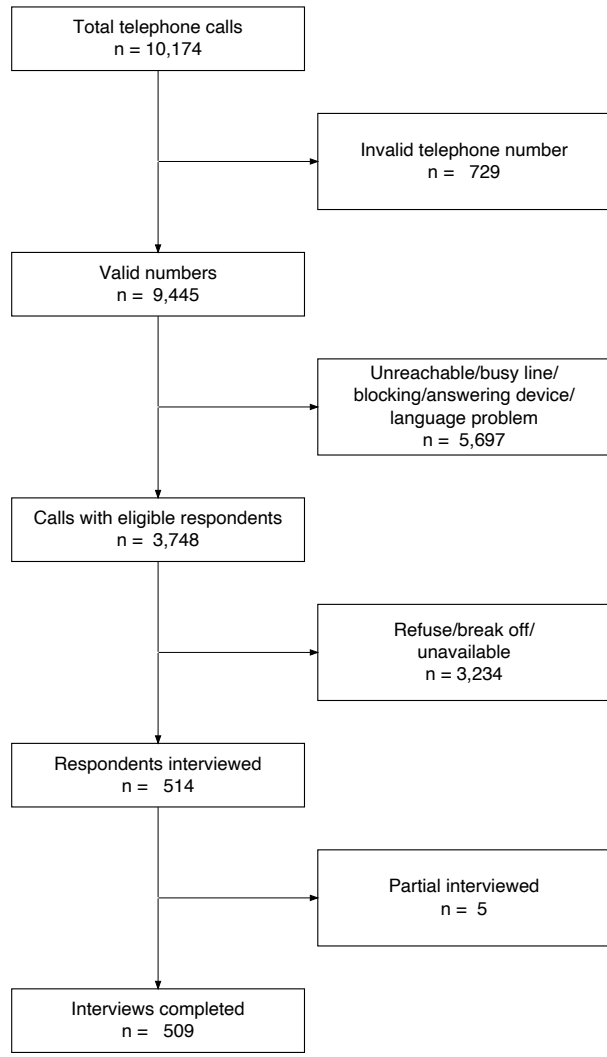

e

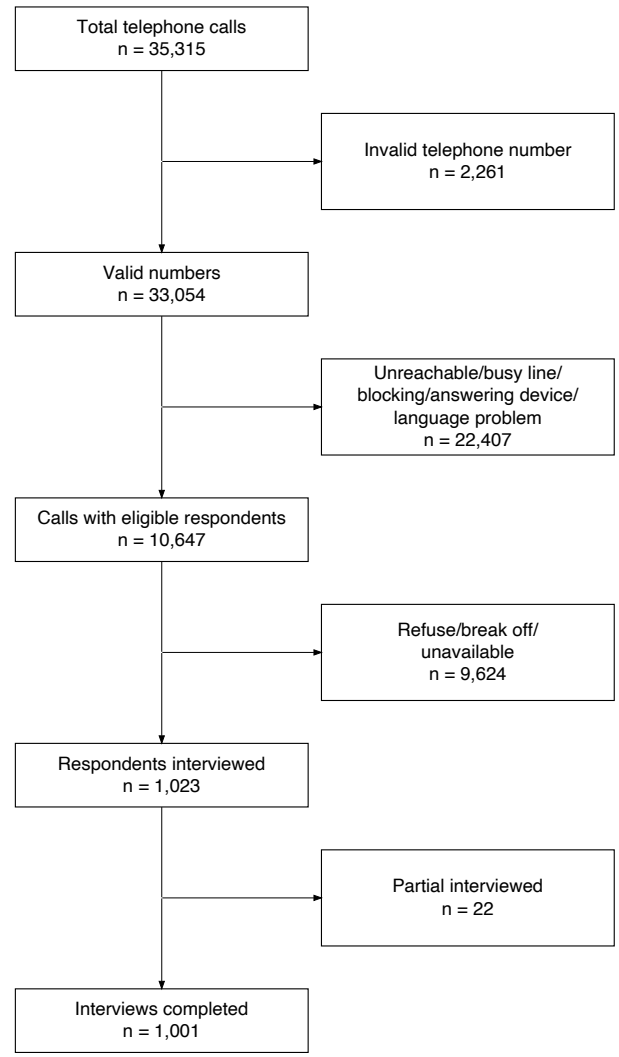

f

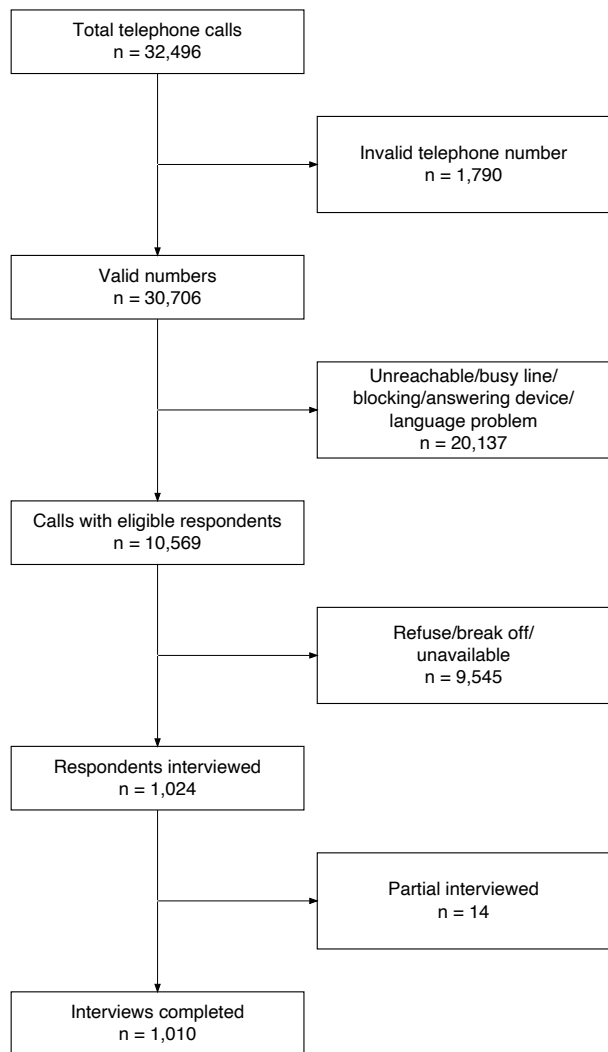

g

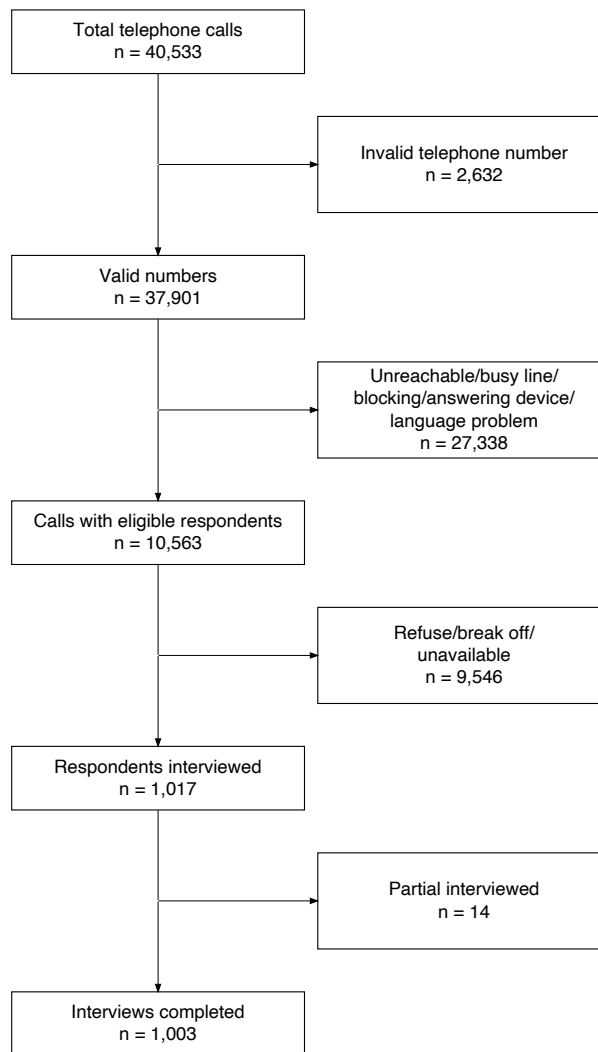

h

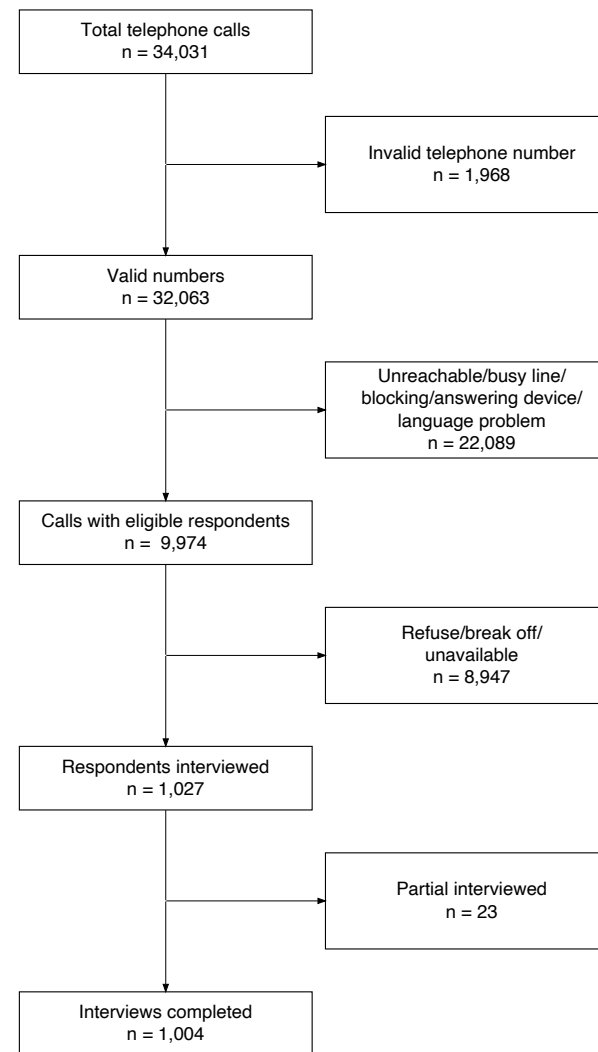

i

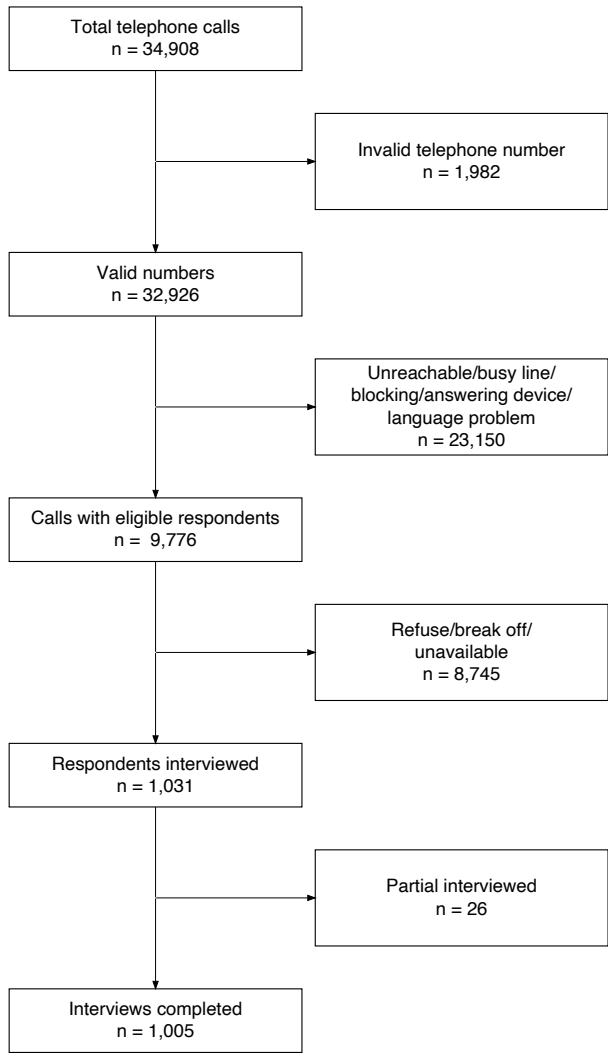

Supplement: mmc6.pdf [file mmc6.pdf]
